# Supplementary material
Source: publisher figshare collection journal article supplement (https://gsajournals.figshare.com/ndownloader/files/28041555)
Supplement: Supplementary file 1 [file 28041555]

## Sheet: Sheet1
Table S5. Summary of Phenotypic Data from Candidate Genes
Gene	Genotype	PPL1 neuron Viability		PPM1/2 neuron Viability		PPM3 neuron viability		Climbing ability
		anti-TH	mCherry	anti-TH	mCherry	anti-TH	mCherry
Tow	Tow mutants	lethal	lethal	lethal	lethal	lethal	lethal	lethal
	TH > TowIR	loss	loss	loss	loss	no loss	no loss	efficient
CG42339	CG42339MI01691	loss	N/A	loss	N/A	no loss	N/A	defective
	TH > CG42339IR	no loss	no loss	loss	no loss	no loss	no loss	efficient
megalin	megalinG17930	loss	N/A	loss	N/A	no loss	N/A	defective
	TH > megalinIR	no loss	no loss	loss	loss	no loss	no loss	defective
plexus	plexusMI12817	loss	N/A	no loss	N/A	no loss	N/A	defective
	TH > plexusIR	loss	loss	loss	loss	no loss	no loss	defective
Trf2	Trf2G0039	lethal	lethal	lethal	lethal	lethal	lethal	lethal
	TH > Trf2IR	loss	N/A	loss	N/A	no loss	N/A	efficient
kirre	kirrerP298-G4	loss	N/A	loss	N/A	no loss	N/A	defective
	TH > kirreIR	loss	loss	loss	loss	no loss	no loss	efficient
tweek	tweekMI09550	lethal	lethal	lethal	lethal	lethal	lethal	lethal
	TH > tweekIR	loss	loss	loss	loss	no loss	no loss	defective
sestrin	sestrinMI/BG	loss	N/A	loss	N/A	no loss	N/A	defective
	TH > sestrinIR	loss	loss	no loss	loss	no loss	no loss	defective
Lim3	Lim31/2	no loss	N/A	no loss	N/A	no loss	N/A	efficient
	TH > Lim3IR	no loss	no loss	loss	no loss	no loss	no loss	defective
